# Supplementary material for: Engineering on the edge of Pd nanosheet cocatalysts for enhanced photocatalytic reduction of CO2 to fuels
Source: Royal Society of Chemistry journal article supplement (doi:10.1039/c6ta10039b), 2017-01-01
Supplement: c6ta10039b1.pdf [file c6ta10039b1.pdf]

*Electronic Supplementary Information (ESI)*

**Engineering on the edge of Pd nanosheet cocatalysts for enhanced photocatalytic reduction of CO<sub>2</sub> to fuels**

Yuzhen Zhu,<sup>a</sup> Zaixiang Xu,<sup>a</sup> Wenya Jiang,<sup>b</sup> Shuxian Zhong,<sup>a</sup> Leihong Zhao<sup>a</sup> and Song Bai<sup>\*a,b</sup>

<sup>a</sup> Key Laboratory of the Ministry of Education for Advanced Catalysis Materials, College of Chemistry and Life sciences, Zhejiang Normal University, Jinhua, Zhejiang, 321004, P. R. China.

<sup>b</sup> School of Chemistry and Materials Science, University of Science and Technology of China, Hefei, Anhui, 230026, P. R. China.

E-mail: [songbai@zjnu.edu.cn](mailto:songbai@zjnu.edu.cn)

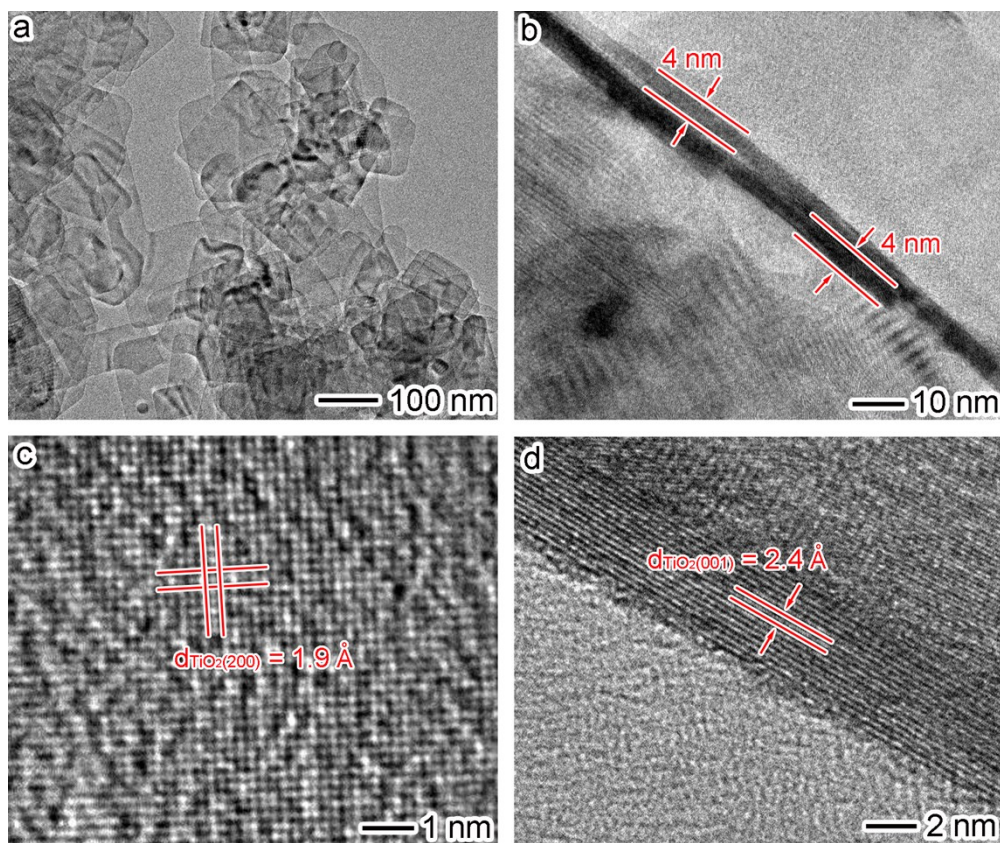

**Fig. S1** TEM and HRTEM images of TiO<sub>2</sub> nanosheets: (a) TEM image showing the flat surface of nanosheets; (b) TEM image showing the cross section and thickness of the nanosheets; (c) HRTEM image showing the lattice fringes of the flat faces; (d) HRTEM image showing the lattice fringes of side faces.

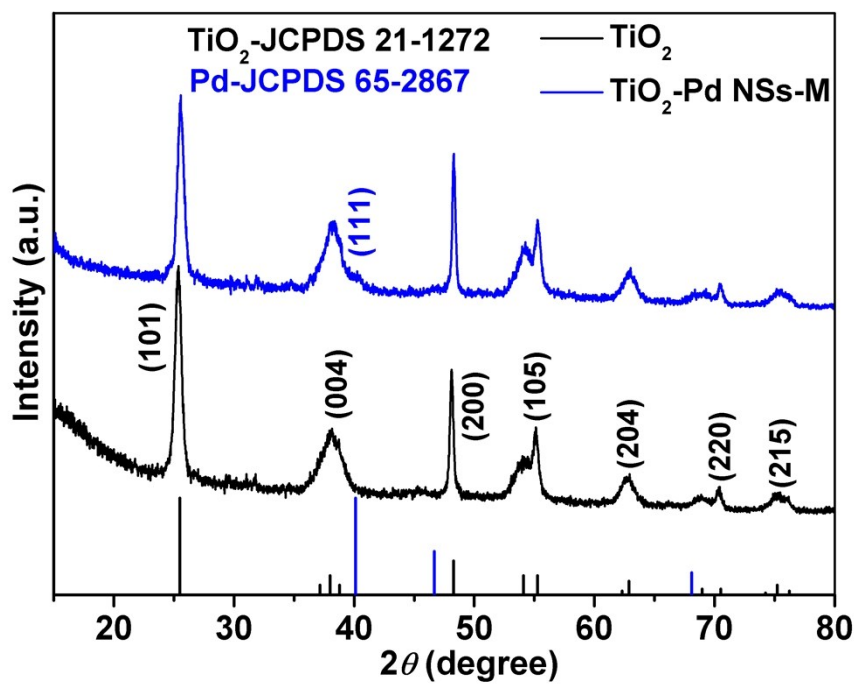

**Fig. S2** XRD patterns of TiO<sub>2</sub>-Pd NSs-M in reference to bare TiO<sub>2</sub> nanosheets. The standard diffraction patterns for anatase TiO<sub>2</sub> (JCPDS 21-1272) and *fcc* Pd (JCPDS 65-2867) are provided as references.

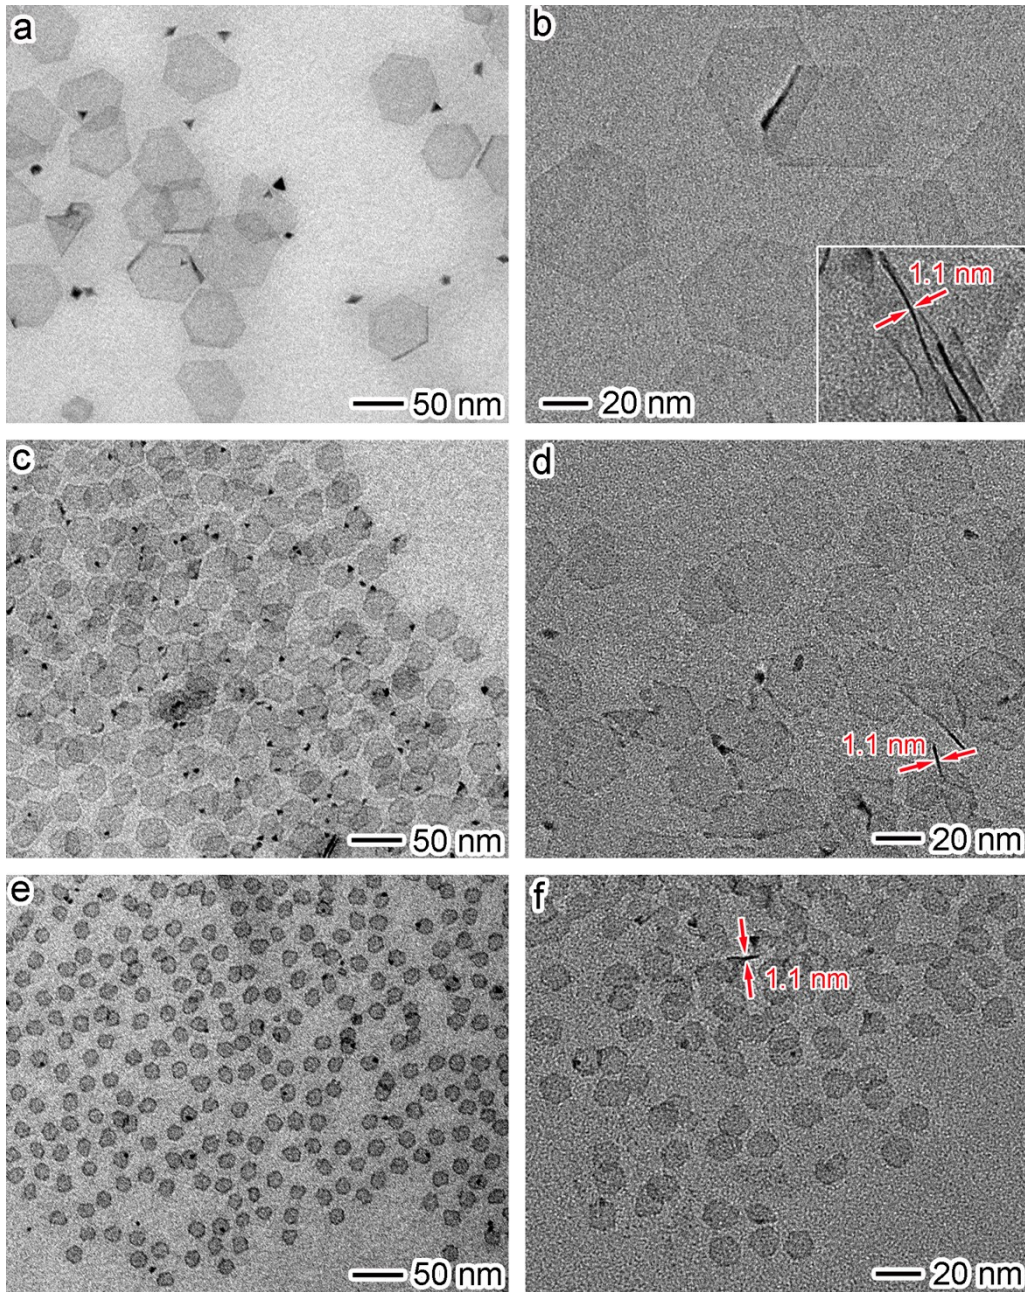

**Fig. S3** TEM images of (a,b) large, (c,d) middle and (e,f) small Pd nanosheets.

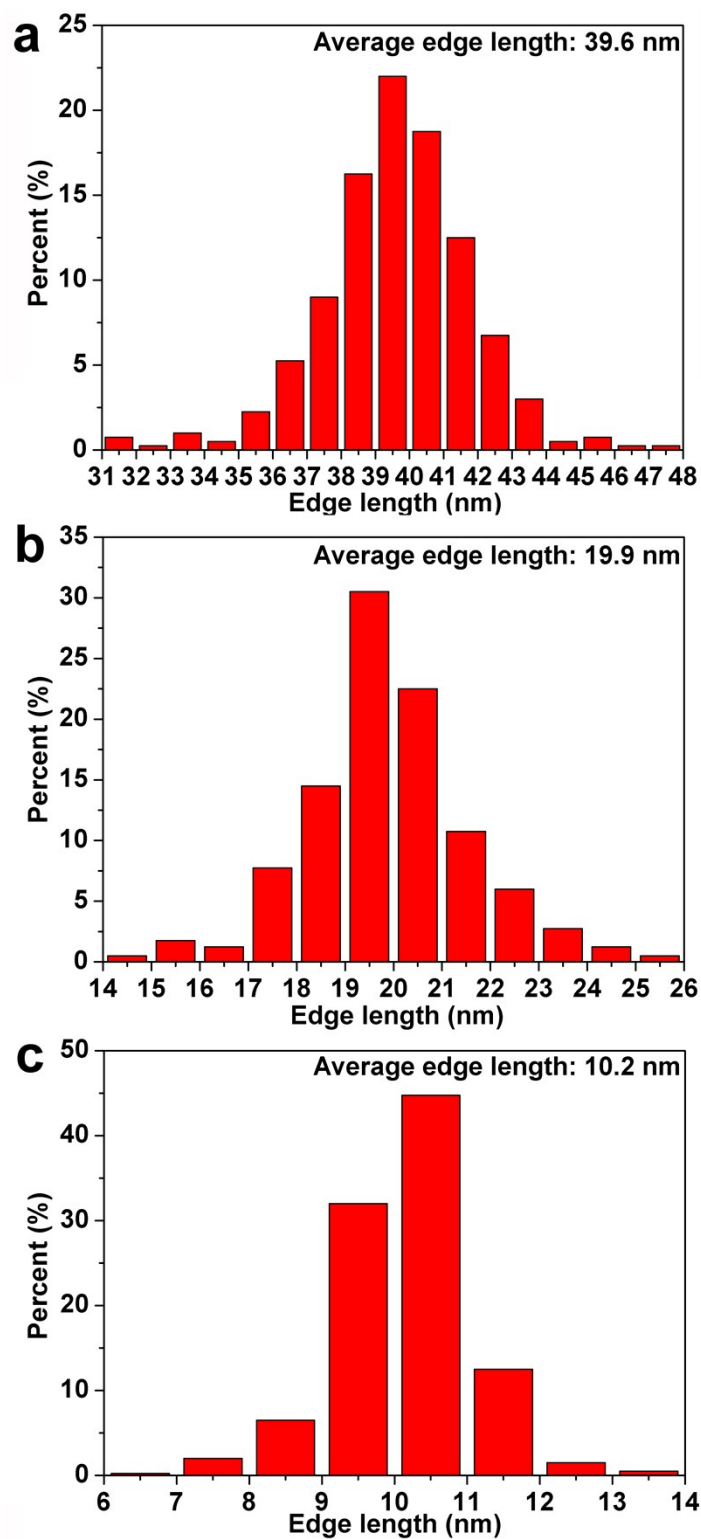

**Fig. S4** Edge length distribution histograms of the as-prepared Pd nanosheets on the TiO<sub>2</sub> nanosheets: (a) TiO<sub>2</sub>-Pd NSs-L, (b) TiO<sub>2</sub>-Pd NSs-M, (c) TiO<sub>2</sub>-Pd NSs-S.

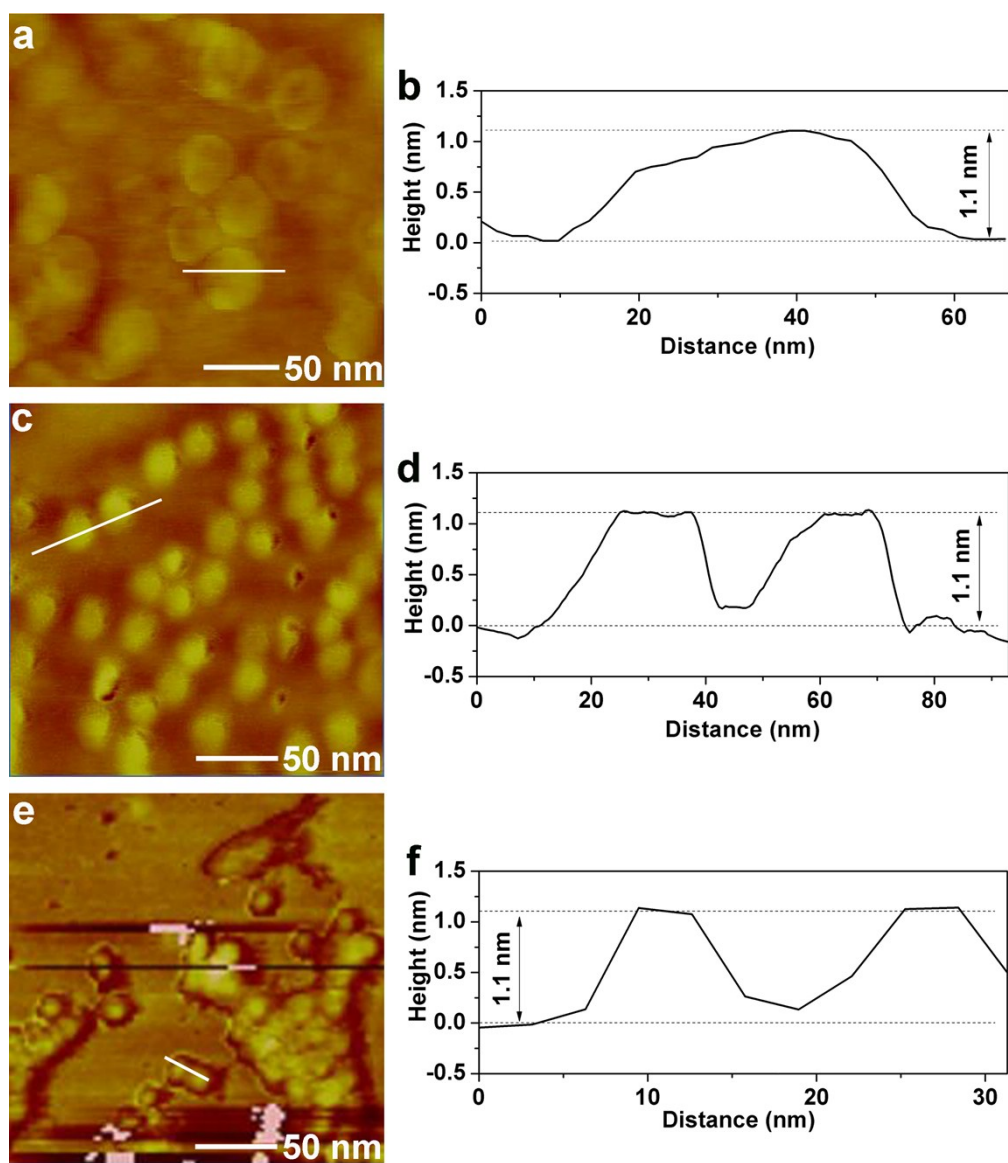

**Fig. S5** AFM images and the corresponding height profiles of Pd nanosheets in (a,b) large, (c,d) middle and (e,f) small size.

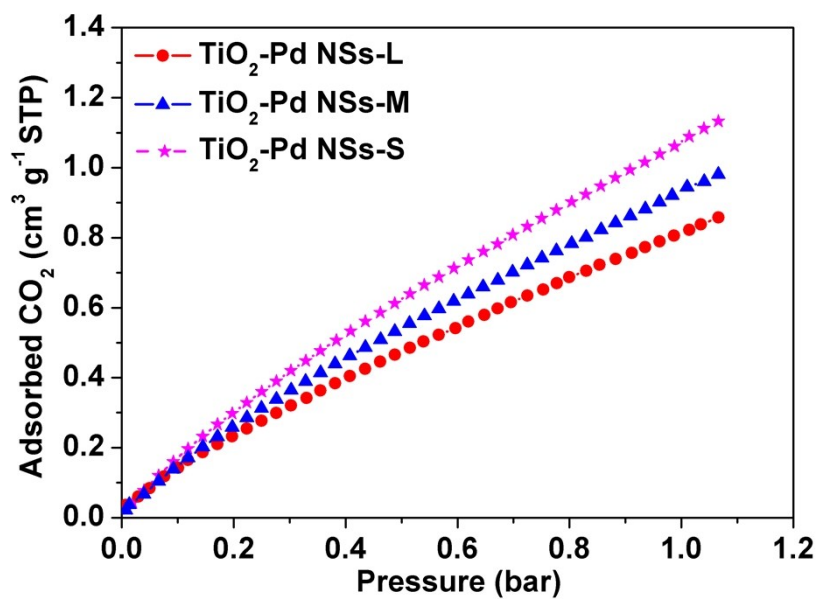

**Fig. S6** CO<sub>2</sub> adsorption behaviors for TiO<sub>2</sub>-Pd NSs samples. The data are plotted based on the total weights of materials.

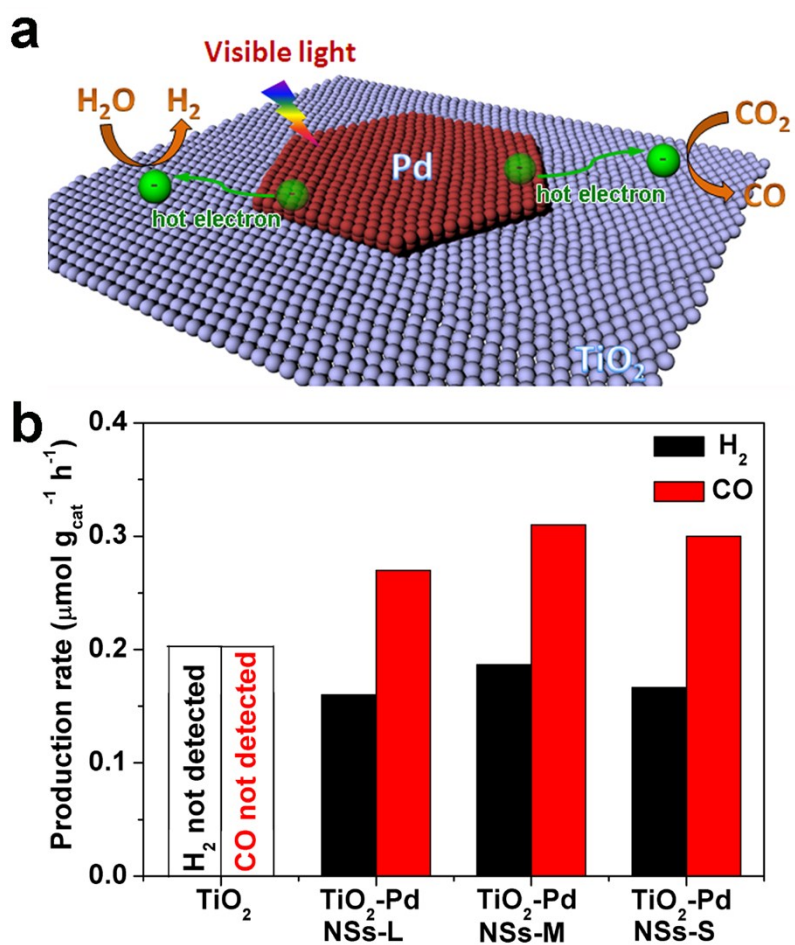

**Fig. S7** (a) Schematic illustration of the photocatalytic mechanism of TiO<sub>2</sub>-Pd NSs samples under visible light irradiation; (b) H<sub>2</sub> and CO average evolution rates of TiO<sub>2</sub>-Pd NSs samples in photocatalytic CO<sub>2</sub> reduction reaction with bare TiO<sub>2</sub> as a reference sample under visible light irradiation ( $400 \text{ nm} < \lambda < 780 \text{ nm}$ ).



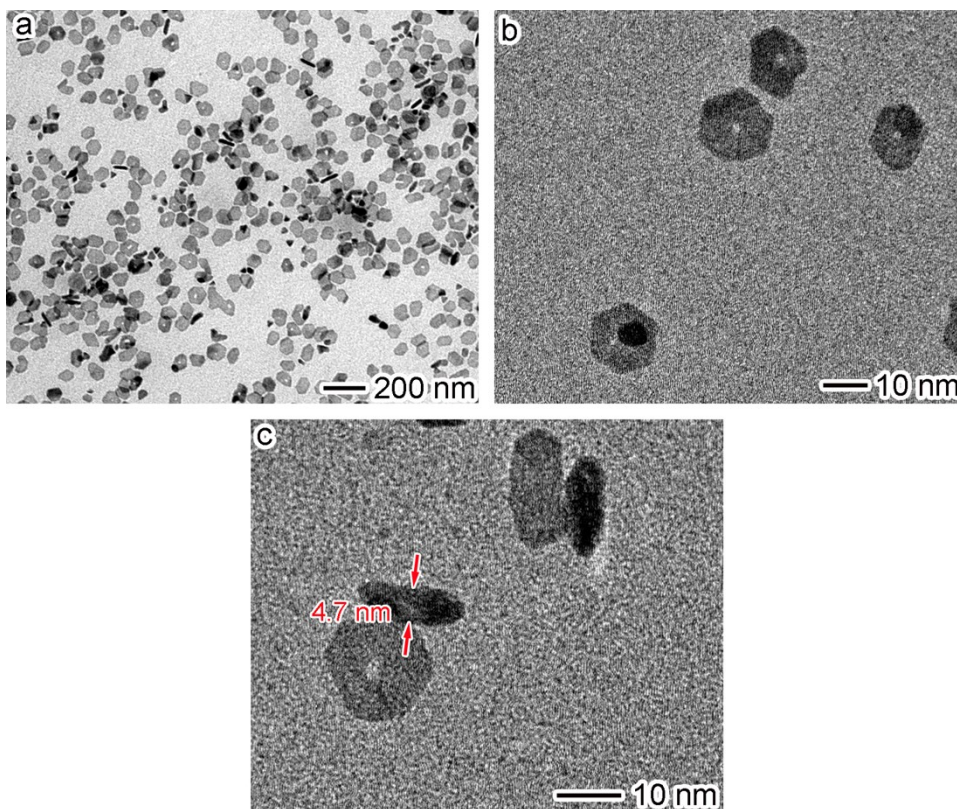

**Fig. S8** TEM images of small Pd nanorings.

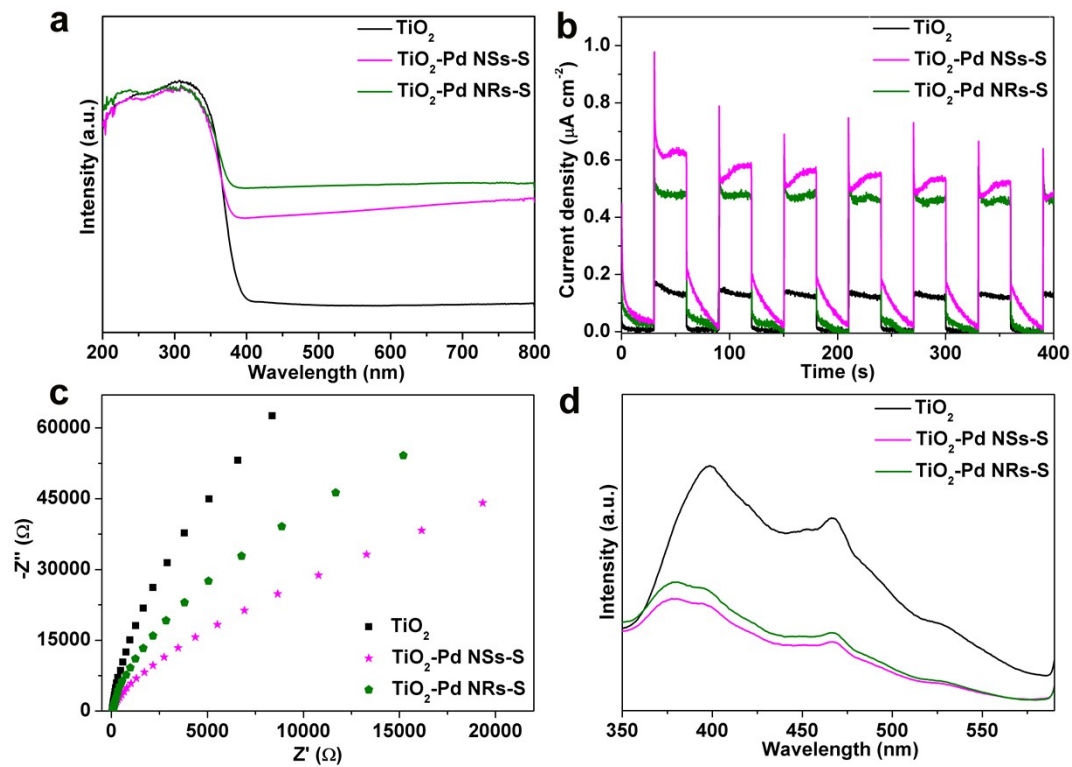

**Fig. S9** (a) UV-vis-NIR diffuse reflectance spectra of bare TiO<sub>2</sub>, TiO<sub>2</sub>-Pd NSs-S and TiO<sub>2</sub>-Pd NRs-S; (b) photocurrent vs. time (*I-t*) curves and (c) EIS Nyquist plots of bare TiO<sub>2</sub>, TiO<sub>2</sub>-Pd NSs-S and TiO<sub>2</sub>-Pd NRs-S at 0.4 V vs. Ag/AgCl under UV light ( $\lambda < 400$  nm) irradiation; (d) PL spectra of bare TiO<sub>2</sub>, TiO<sub>2</sub>-Pd NSs-S and TiO<sub>2</sub>-Pd NRs-S excited at 310 nm.

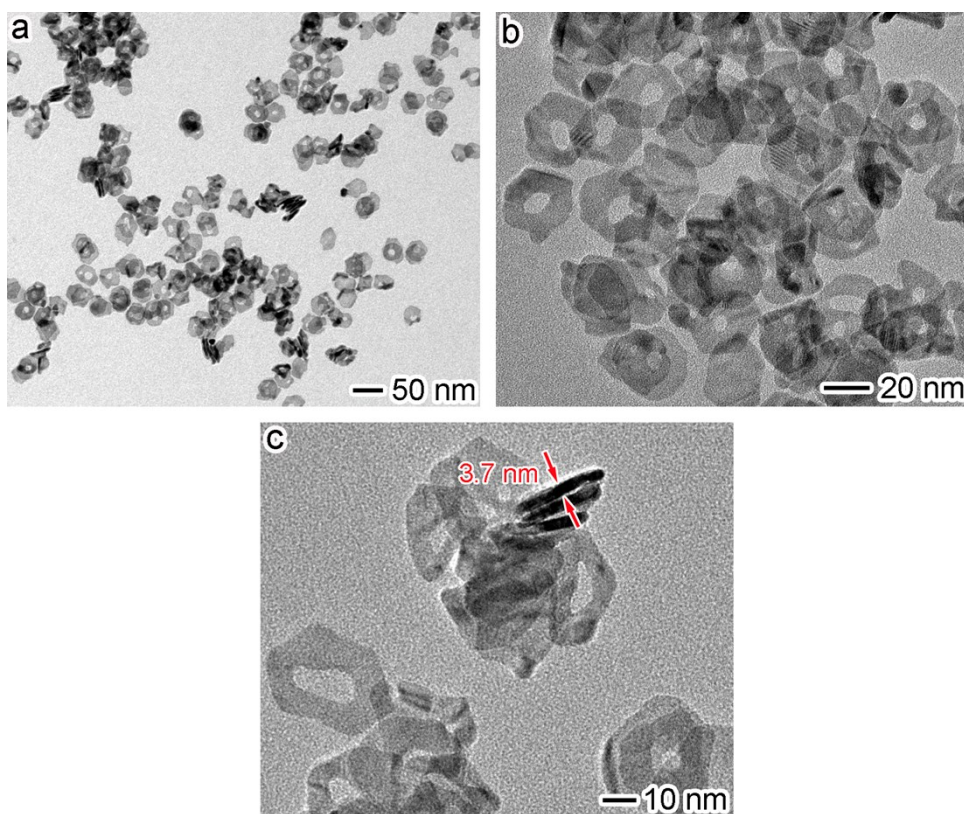

**Fig. S10** TEM images of middle Pd nanorings.

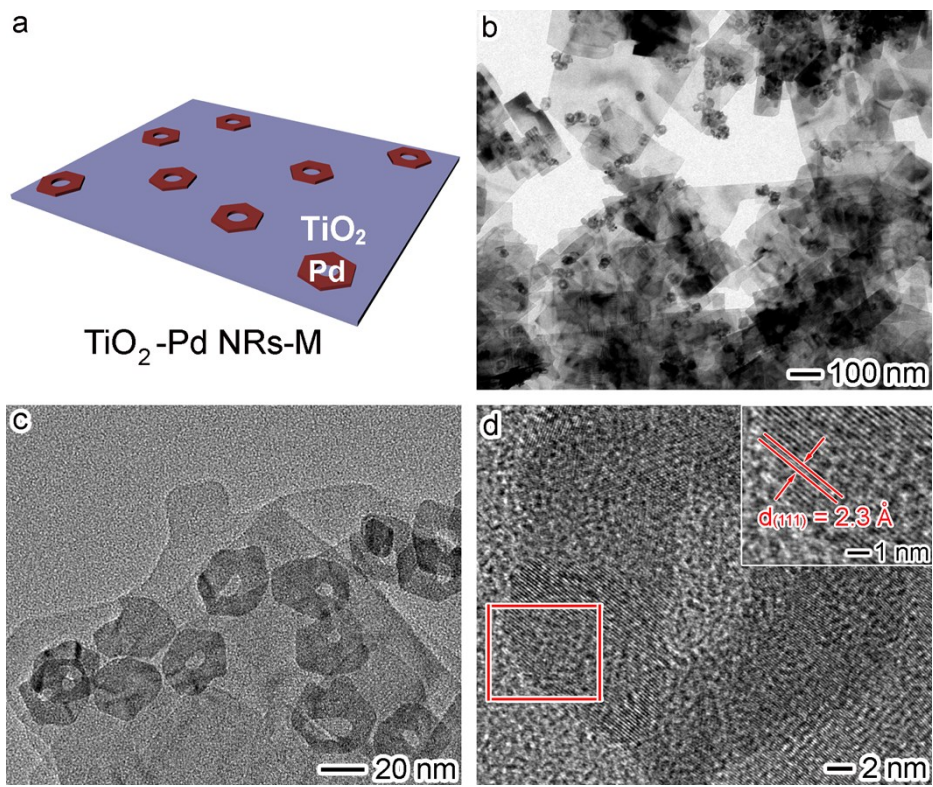

**Fig. S11** (a) Schematic illustration, (b,c) TEM and (d) HRTEM images of TiO<sub>2</sub>-Pd NRs-M.

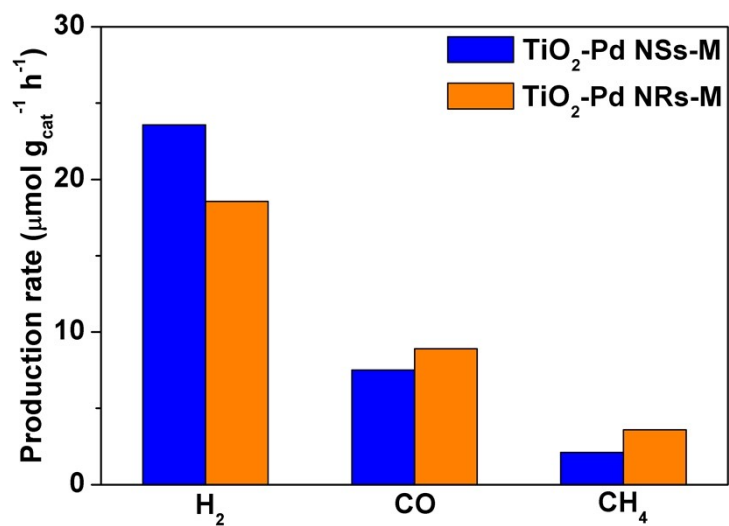

**Fig. S12** H<sub>2</sub>, CO, and CH<sub>4</sub> average evolution rates of TiO<sub>2</sub>-Pd NRs-M in photocatalytic CO<sub>2</sub> reduction reaction with TiO<sub>2</sub>-Pd NSs-M as a reference sample.

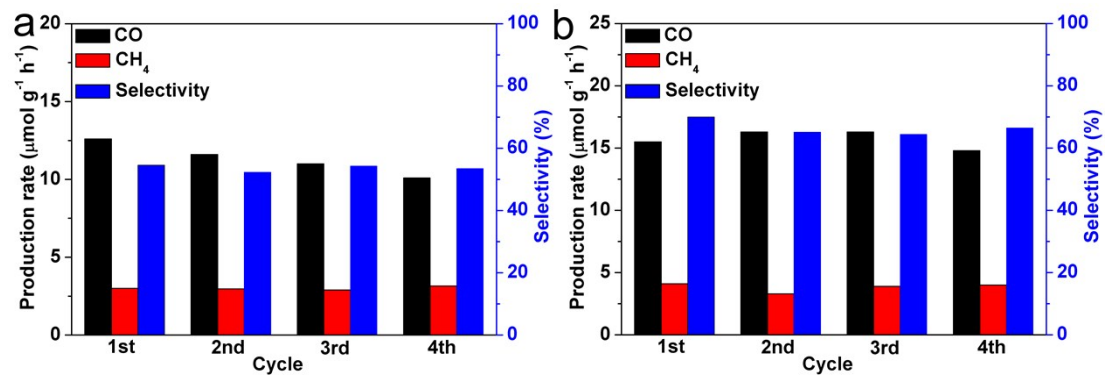

**Fig. S13** Stability studies of CO and CH<sub>4</sub> evolution rates as well as the selectivity for CO<sub>2</sub> reduction with (a) TiO<sub>2</sub>-Pd NSs-S and (b) TiO<sub>2</sub>-Pd NRs-S as catalysts in the photocatalytic cyclic process.

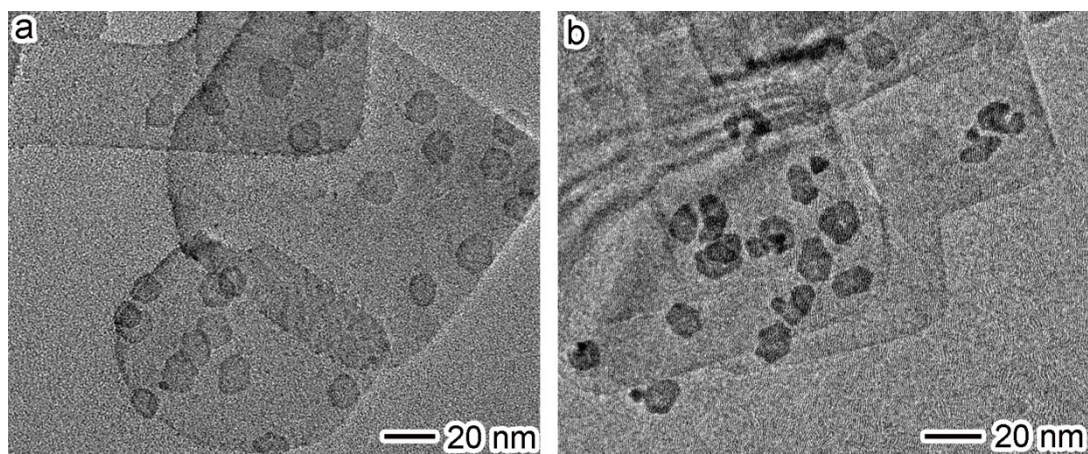

**Fig. S14.** TEM images of (a)  $\text{TiO}_2\text{-Pd NSs-S}$  and (b)  $\text{TiO}_2\text{-Pd NR-S}$  after the photocatalytic cyclic process.

**Table S1.** Chemical compositions of the TiO<sub>2</sub>-Pd NSs and TiO<sub>2</sub>-Pd NRs samples determined by ICP-MS.

| Sample                     | Weight ratio of Pd : TiO <sub>2</sub> |
|----------------------------|---------------------------------------|
| TiO <sub>2</sub> -Pd NSs-L | 4.6%                                  |
| TiO <sub>2</sub> -Pd NSs-M | 5.0%                                  |
| TiO <sub>2</sub> -Pd NSs-S | 4.8%                                  |
| TiO <sub>2</sub> -Pd NRs-S | 4.9%                                  |
| TiO <sub>2</sub> -Pd NRs-M | 4.8%                                  |
